# Supplementary material for: Local structure of a highly concentrated NaClO4 aqueous solution-type electrolyte for sodium ion batteries
Source: Royal Society of Chemistry journal article supplement (doi:10.1039/d0cp04376a), 2020-01-01
Supplement: d0cp04376a1.pdf [file d0cp04376a1.pdf]

# Supporting Information

Local structure of a highly concentrated NaClO<sub>4</sub> aqueous solution-type electrolyte for sodium ion batteries.

Ryo Sakamoto<sup>1</sup>, Maho Yamashita<sup>2</sup>, Kosuke Nakamoto<sup>3</sup>, Yongpuan Zhou<sup>4</sup>, Nobuko Yoshimoto<sup>2</sup>, Kenta Fujii<sup>2</sup>, Toshio Yamaguchi<sup>5</sup>, Ayuko Kitajou<sup>2, 6, \*</sup>, Shigeto Okada<sup>3, 6, \*</sup>

<sup>1</sup>Interdisciplinary Graduate School of Engineering Sciences, Kyushu University, 6-1 Kasuga-koen, Kasuga 816-8580, Japan

<sup>2</sup>Graduate School of Sciences and Technology for Innovation, Yamaguchi University, 2-16-1 Tokiwadai, Yamaguchi Ube, 755-8611, Japan

<sup>3</sup>Institute for Materials Chemistry and Engineering, Kyushu University, 6-1 Kasuga-koen, Kasuga 816-8580, Japan

<sup>4</sup>Key Laboratory of Comprehensive and Highly Efficient Utilization of Salt Lake Resources, Qinghai Institute of Salt Lakes, Chinese Academy of Sciences, Xining 810008, China

<sup>5</sup>Department of Chemistry, Faculty of Science, Fukuoka University, 8-19-1 Nanakuma, Jonan, Fukuoka 814-0180, Japan

<sup>6</sup>Elements Strategy Initiative for Catalysts and Batteries (ESICB), Kyoto University, Kyoto, 615-8245, Japan

\*Corresponding authors

Table S1. Setup details for the EPSR simulation boxes.

| Concentration<br>(m) | Water<br>molecules | Na <sup>+</sup> cations | ClO <sub>4</sub> <sup>-</sup><br>anions | Density<br>atoms Å <sup>-3</sup> | Box size<br>length (Å) |
|----------------------|--------------------|-------------------------|-----------------------------------------|----------------------------------|------------------------|
| 1                    | 1000               | 18                      | 18                                      | 0.09877                          | 31.571                 |
| 5                    | 1000               | 90                      | 90                                      | 0.09535                          | 33.361                 |
| 10                   | 1000               | 180                     | 180                                     | 0.09177                          | 35.426                 |
| 13                   | 1000               | 234                     | 234                                     | 0.08991                          | 36.589                 |
| 17                   | 1000               | 306                     | 306                                     | 0.08792                          | 38.030                 |

Table S2. Potential parameter values used in EPSR modeling for NaClO<sub>4</sub> solution.

|                           | O <sub>w</sub> <sup>[1]</sup> | H <sup>[1]</sup> | Na <sup>[1]</sup> | Cl <sup>[2]</sup> | O <sub>Cl</sub> <sup>[2]</sup> |
|---------------------------|-------------------------------|------------------|-------------------|-------------------|--------------------------------|
| ε (kJ mol <sup>-1</sup> ) | 0.65                          | 0.00             | 0.514             | 0.566             | 0.65                           |
| σ (Å)                     | 3.16                          | 0.00             | 2.29              | 4.19              | 3.16                           |
| mass                      | 16                            | 2.00             | 23                | 35.45             | 16                             |
| charge                    | -0.8476                       | 0.4238           | 1.00              | 1.88              | -0.72                          |

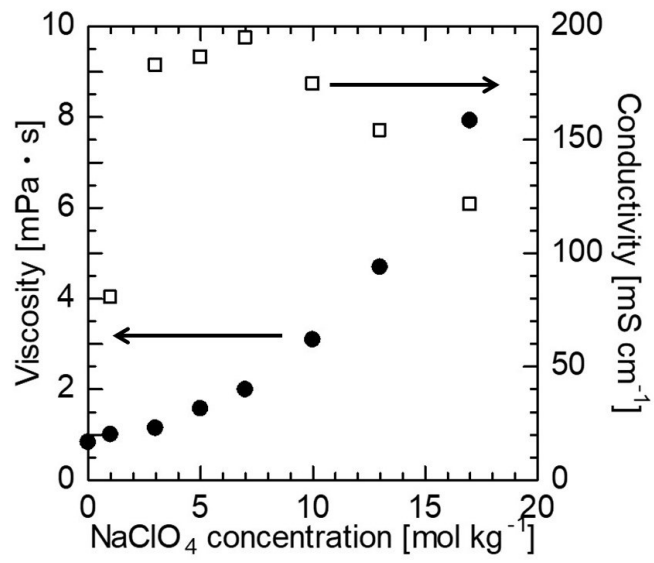

Fig. S1 Viscosity and electric conductivity of the NaClO<sub>4</sub> aq. electrolytes at various concentrations

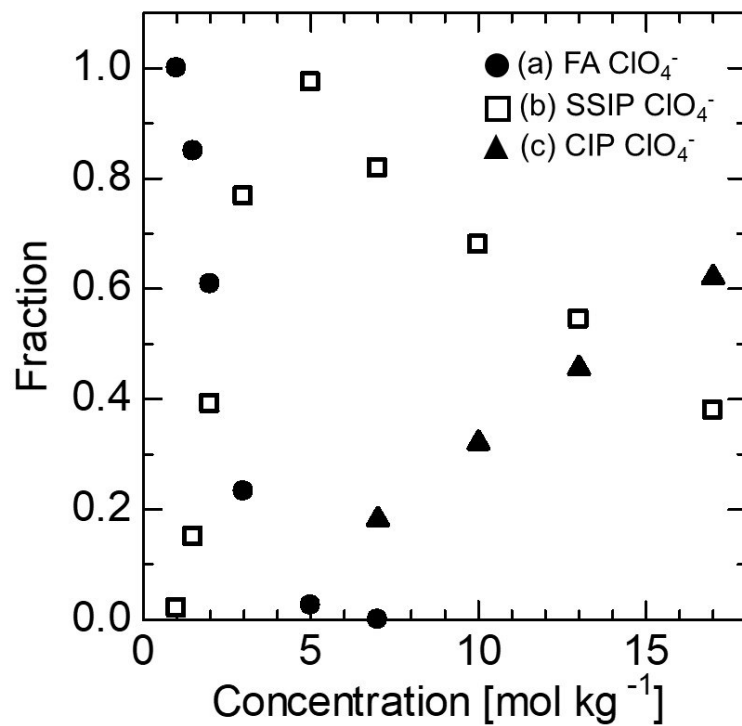

Fig. S2 The fraction of each component (FA ClO<sub>4</sub><sup>-</sup>, SSIP ClO<sub>4</sub><sup>-</sup> and CIP ClO<sub>4</sub><sup>-</sup>) in aqueous electrolyte with each NaClO<sub>4</sub> salt concentration (1, 3, 5, 7, 10, 13 and 17 m)

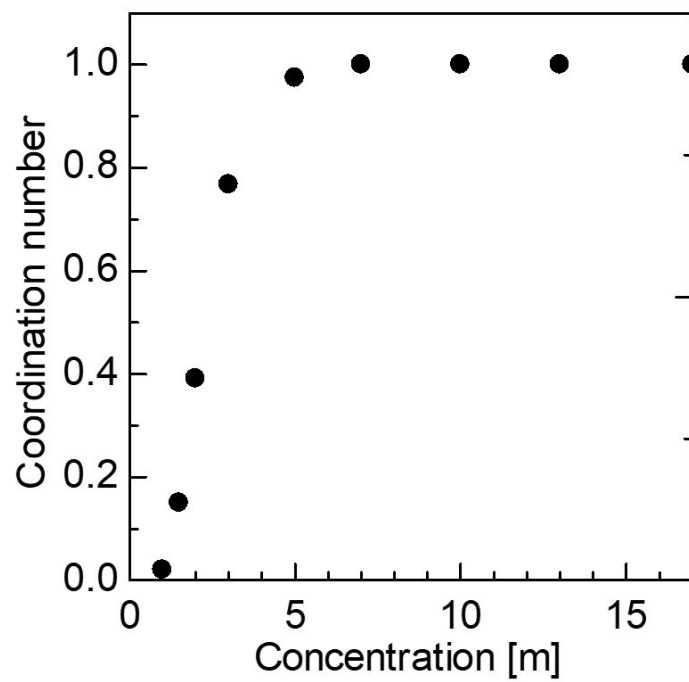

Fig. S3 The calculated average coordination number of  $\text{ClO}_4^-$  ions

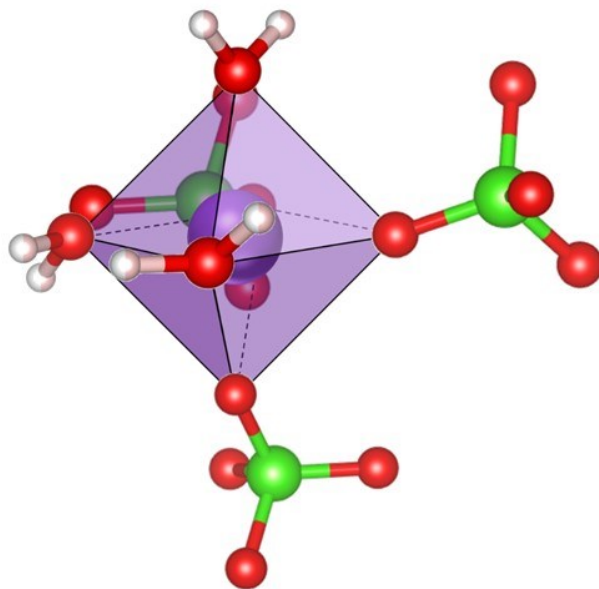

Fig. S4 Illustration of the local structure around an  $\text{Na}^+$  ion in 17 m  $\text{NaClO}_4$  aqueous electrolyte.

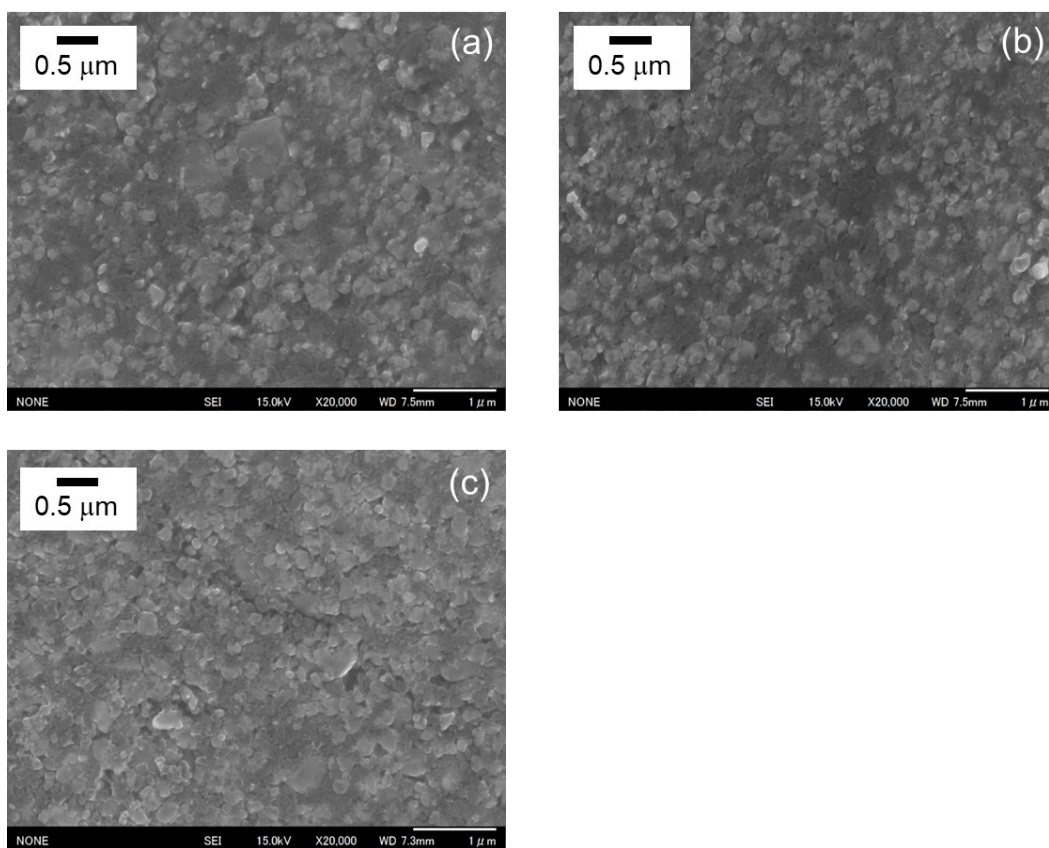

Fig. S5 SEM images of (a) pristine and cycled NTP electrode with (b) 1 m and (c) 17 m NaClO<sub>4</sub> aq. electrolytes.

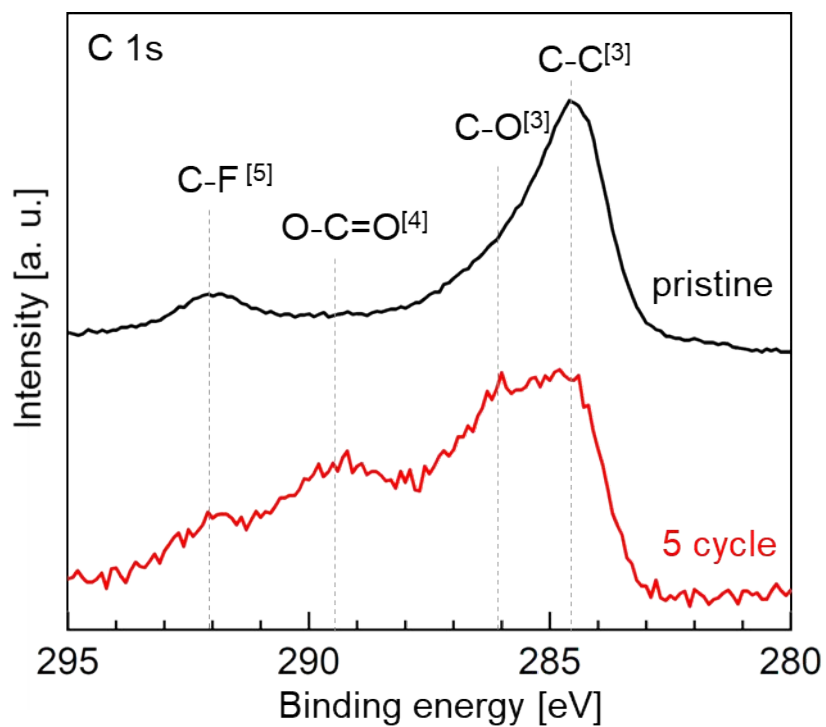

Fig. S6 C 1s XPS peaks of NTP electrodes before and after 5 cycles with 17 m NaClO<sub>4</sub> aq. electrolyte.



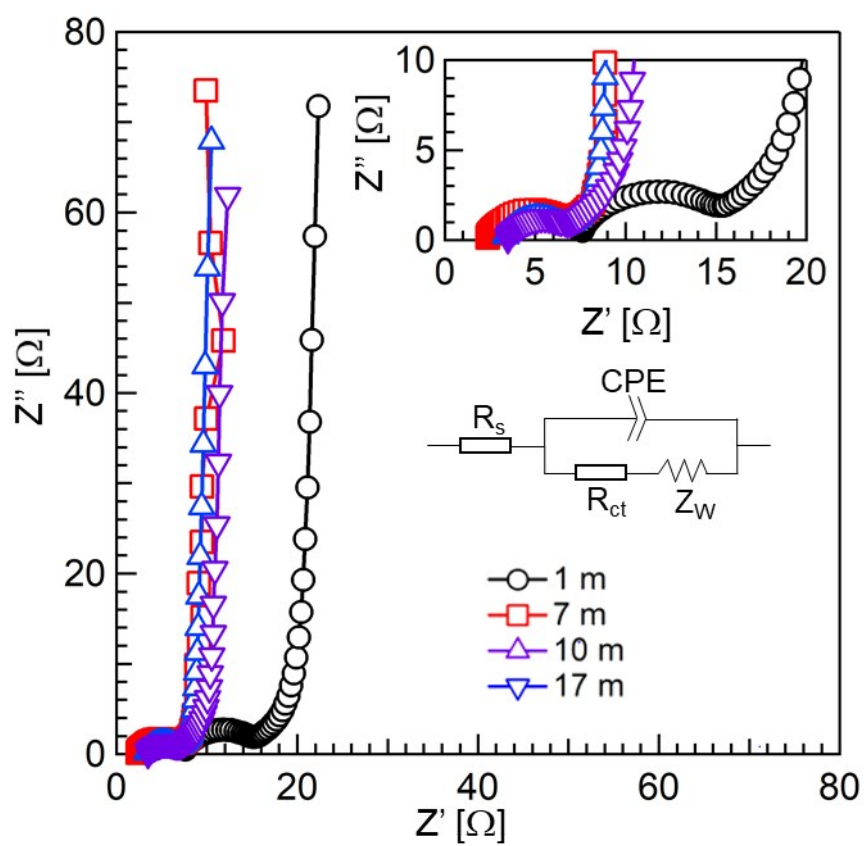

Fig. S7 Nyquist plots of NTP with 1, 7, 10 and 17 m NaClO<sub>4</sub> aq. electrolyte. Insets are the magnified spectra and the equivalent circuit.

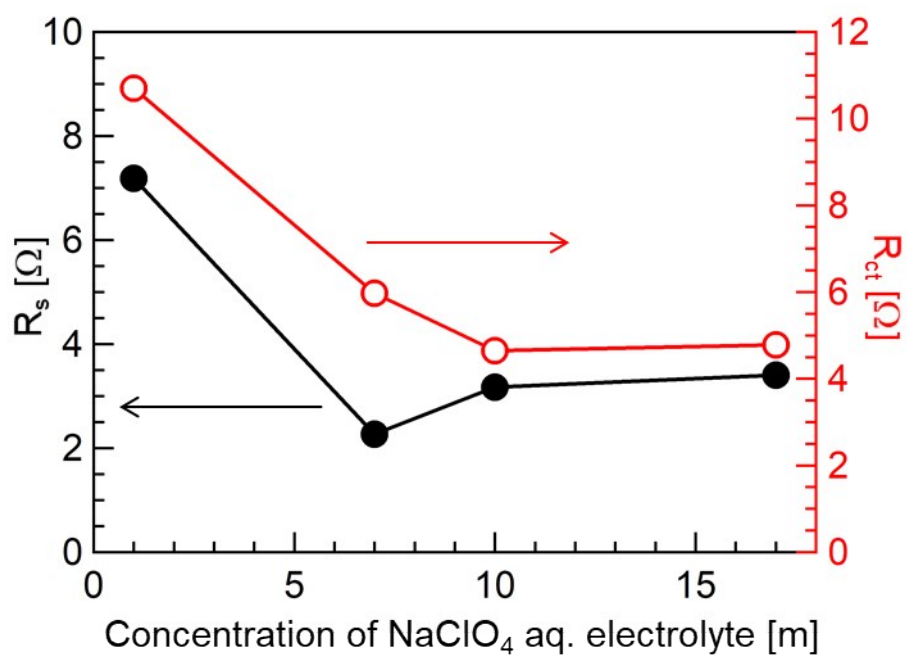

Fig. S8 The calculated  $R_s$  and  $R_{ct}$  from Nyquist plots in each  $\text{NaClO}_4$  aq. electrolytes.

### Supplementary References

1. R. Mancinelli, A. Botti, F. Bruni, M. A. Ricci, and A. K. Soper, *J. Phys. Chem. B*, 2007, **111**, 13570.
2. D. T. Bowron, E. C. Beret, E. Martin-Zamora, A. K. Soper, and E. S. Marcos, *J. Am. Chem. Soc.*, 2012, **134**, 962.
3. S. Ye, Z. Li, T. Song, D. Cheng, Q. Xu, H. Liu, and Y. Wang, *RSC Adv.*, 2017, **7**, 56743.
4. Y.-C. Lin, Y.-Y. Chen, B.-Y. Yu, W.-C. Lin, C.-H. Kuo, and J.-J. Shyue, *Analyst*, 2009, **134**, 945.
5. X.L. Zhu, S.B. Liu, B.Y. Man, C.Q. Xie, D.P. Chen, D.Q. Wang, T.C. Ye, and M. Liu, *Appl. Surf. Sci.*, 2007, **253**, 3122.
